# Supplementary material for: Unusually high ortho-selectivity in electrophilic aromatic substitution promoted by GaCl3
Source: Royal Society of Chemistry journal article supplement (doi:10.1039/b003215h), 2000-01-01
Supplement: b003215h.doc [file b003215h.doc]

**Supplementary Materials**

1H-NMR and 13C-NMR spectra were obtained on a Varian Mercury (400 MHz). Chemical shift values are given in ppm relative to internal Me4Si. IR spectra were recorded on a JASCO FT/IR-410 or an Applied System React-IR 1000. MS spectra were taken with a JEOL JMS-DX303 or a JEOL JMS-AX500. Gel permiation chromatography (GPC) was conducted with a Recycling Preparative HPLC LC-908 (Japan Analyticial Industry, Co. Ltd.).

**Reaction of *p*-Xylene. Method A:** Under an argon atmosphere, to a solution of *p*-xylene (0.31 mL, 2.5 mmol) in CH2Cl2 (4 mL) was added a solution of GaCl3 (1.0 M in methylcyclohexane, 1.0 mL) at -98 °C (acetone-liquid nitrogen bath). To this mixture, **1** (97 mg, 0.5 mmol) in CH2Cl2 (1 mL) was added at the temperature. After the mixture was stirred for 1 h, THF (3 mL) was added, and stirring was continued for another 30 min. Water was added, and the mixture was warmed to room temperature. The organic materials were extracted with hexane, and the organic layer was dried over MgSO4. Solvents were removed *in vacuo*, and the residue was purified by flash chromatography (silica gel, hexane) to give *(Z)*-1,4-bis(trimethylsilyl)-2-(2,5-dimethylphenyl)-1-buten-3-yne (**7**) (74 mg, 49%) and 4-trimethylsilyl-2-(2,5-dimethylphenyl)-1-buten-3-yne (10 mg, 9%). ***(Z)*-1,4-Bis(trimethylsilyl)-2-(2,5-dimethylphenyl)-1-buten-3-yne (7):** 1H-NMR (400 MHz, CDCl3)  0.18 (9, s), 0.25 (9H, s), 2.30 (3H, s), 2.35 (3H, s), 6.08 (1H, s), 6.99 (1H, d, J = 8.0 Hz), 7.02 (1H, s), 7.03 (1H, d, J=7.2 Hz). 13C-NMR (100 MHz, CDCl3)  -0.92, -0.13, 19.83, 20.98, 99.07, 105.34, 128.05, 128.89, 129.99, 131.61, 135.08, 138.81, 141.86, 143.55. IR (neat) 2957, 2141, 1551, 1494, 1449, 1308, 1249, 1163, 1128, 1036, 905, 886, 841, 810, 784, 759, 701 cm-1. MS (EI, 70eV) *m/z* (%) 300 (17, **M**+), 285 (16), 227 (100), 211 (30), 155 (48), 97 (12), 73 (79). HRMS (EI,70eV) Calcd for C18H28Si2: 300.1728. Found: 300.1737. **4-Trimethylsilyl-2-(2,5-dimethylphenyl)-1-buten-3-yne:** 1H-NMR (400 MHz, CDCl3)  0.19 (9, s), 2.31 (3H, s), 2.38 (3H, s), 5.49 (1H, d, J = 2.0 Hz), 5.79 (1H, d, J = 2.0 Hz), 7.02 (1H, d, J = 8.0 Hz), 7.058 (1H, s), 7.060 (1H, d, J = 7.2 Hz). 13C-NMR (100 MHz, CDCl3)  0.04, 19.86, 20.96, 95.49, 104.63, 125.90, 128.44, 129.30, 130.14, 131.93, 132.33, 135.16, 138.61. IR (neat) 2959, 2142, 1593, 1496, 1452, 1407, 1305, 1250, 1199, 1144, 1087, 895, 844, 812, 760 cm-1. MS (EI, 70eV) *m/z* (%) 228 (76, **M**+), 213 (100), 197 (37), 156 (15), 83 (63), 73 (32). HRMS (EI,70eV) Calcd for C15H20Si: 228.1333. Found: 228.1335 (**M**+). **Method B:** Under an argon atmosphere, to a solution of *p*-xylene (0.31 mL, 2.5mmol) in CH2Cl2 (4 mL) added dropwise a solution of GaCl3 (1.0 M in methylcyclohexane, 1.0 mL) at –98 °C (acetone-liquid nitrogen bath). To this mixture, **1** (97 mg, 0.5 mmol) in CH2Cl2 (1 mL) was added at the temperature. After the mixture was stirred for 30 min at -98 ° C, a solution of GaCl3 (1.0 M in methylcyclohexane, 1.0 mL) was added. After 30 min, THF (3 mL) was added, and stirring was continued for another 30 min. Water was added, and the mixture was warmed to room temperature. The organic materials were extracted with hexane, and the organic layer was dried over MgSO4. Solvents were removed *in vacuo*, and the residue was purified by flash chromatography (silica gel, hexane) to give **7** (101 mg, 68%) and 4-trimethylsilyl-2-(2,5-dimethylphenyl)-1-buten-3-yne (24 mg, 21%).

**Reaction of Toluene (Method A)**. *(Z)*-1,4-Bis(trimethylsilyl)-2-(2-methylphenyl)-1-buten-3-yne and 4-trimethylsilyl-2-(2-methylphenyl)-1-buten-3-yne were obtained in 23% and 14% yield, respectively, which were isolated by flash chromatography over silica gel (hexane). ***(Z)*-1,4-Bis(trimethylsilyl)-2-(2-methylphenyl)-1-buten-3-yne:** 1H-NMR (400MHz, CDCl3)  0.19 (9H, s), 0.26 (9H, s), 2.40 (3H, s), 6.10 (1H, s), 7.13-7.23 (4H, m). 13C-NMR (100MHz, CDCl3)  -0.94, -0.14, 20.34, 99.12, 105.29, 125.67, 127.33, 128.24, 130.08, 134.75, 138.59, 142.05, 143.85. IR (neat) 2957, 2898, 2144, 1551, 1483, 1456, 1249, 1115, 1012, 841, 764, 744, 728, 700 cm-1. MS (EI, 70eV) *m/z* (%) 286 (2, **M**+), 271 (10), 213 (65), 197 (21), 183 (24), 155 (71), 97 (13), 73 (100). HRMS (EI,70eV) Calcd for C17H26Si2: 286.1572. Found 286.1572 (**M**+). **4-Trimethylsilyl-2-(2-methylphenyl)-1-buten-3-yne:** 1H-NMR (400MHz, CD2Cl2)  0.19 (9H, s), 2.42 (3H, s), 5.50 (1H, d, J = 2.0Hz), 5.79 (1H, d, J = 2.0Hz), 7.15-7.24 (4H, m). 13C-NMR (100MHz, CDCl3)  1.30, 21.64, 96.83, 105.80, 125.73, 126.13, 127.73, 128.64, 130.22, 131.77, 135.49, 138.80. IR (neat) 2959, 2146, 1648, 1598, 1488, 1456, 1305, 1250, 1126, 1091, 1043, 1014, 954, 844, 761, 731, 701 cm-1. MS (EI, 70eV) *m/z* (%) 214 (46, **M**+), 199 (100), 183 (41), 155 (23), 141 (17), 83 (99), 73 (65). HRMS (EI,70eV) Calcd for C14H18Si: 214.1176. Found 214.1180 (**M**+).

**Reaction of Ethylbenzene (Method A)**. *(Z)*-1,4-Bis(trimethylsilyl)-2-(2-ethylphenyl)-1-buten-3-yne, *(Z)*-1,4-bis(trimethylsilyl)-2-(3-ethylphenyl)-1-buten-3-yne, *(Z)*-1,4-bis(trimethylsilyl)-2-(4-ethylphenyl)-1-buten-3-yne, and 4-trimethylsilyl-2-(2-ethylphenyl)-1-buten-3-yne were obtained in 26%, 4%, 7%, and 22% yield, respectively, which were determined by 1H-NMR. Authentic samples were obtained by GPC (CHCl3) isolation. Very small amounts of other isomers, tentatively assigned to 4-trimethylsilyl-2-(3-ethylphenyl)-1-buten-3-yne and 4-trimethylsilyl-2-(4-ethylphenyl)-1-buten-3-yne were also detected in *ca* 1% yields. ***(Z)*-1,4-Bis(trimethylsilyl)-2-(2-ethylphenyl)-1-buten-3-yne:** 1H-NMR (400MHz, CDCl3)  0.18 (9H, s), 0.26 (9H, s), 1.23 (3H, t, J = 7.6Hz), 2.80 (2H, q, J = 7.6Hz), 6.08 (1H, s), 7.12-7.24 (4H, m). 13C-NMR (100MHz, CDCl3)  -1.00, -0.16, 15.49, 26.23, 99.05, 105.62, 125.59, 127.53, 128.47, 128.49, 138.66, 140.86, 141.86, 143.97. IR (neat) 2961, 2898, 2144, 1551, 1480, 1448, 1407, 1309, 1249, 1119, 1011, 841, 761 cm-1. MS (EI, 70eV) *m/z* (%) 300 (1, **M**+), 285 (5), 227 (62), 211 (23), 197 (25), 155 (22), 73 (100). HRMS (EI,70eV) Calcd. for C18H28Si2: 300.1728. Found 300.1735 (**M**+). ***(Z)*-1,4-Bis(trimethylsilyl)-2-(4-ethylphenyl)-1-buten-3-yne:** 1H-NMR (400MHz, CDCl3) 0.250 (9H, s), 0.254 (9H, s), 1.23 (3H, t, J = 7.6Hz), 2.65 (2H, q, J = 7.6Hz), 6.56 (1H, s), 7.16 (2H, d, J = 8.4Hz), 7.59 (2H, d, J = 8.0Hz). 13C-NMR (100MHz, CDCl3)  -0.92, -0.08, 15.69, 28.66, 99.00, 104.89, 125.75, 127.58, 136.37, 136.80, 137.12, 144.26. IR (neat) 2961, 2898, 2147, 1731, 1543, 1508, 1458, 1412, 1249, 1121, 1012, 840, 760 cm-1. MS (EI, 70eV) *m/z*(%) 300 (21, **M**+), 285 (18), 227 (14), 183 (13), 155 (58), 97 (15), 73 (100). HRMS (EI,70eV) Calcd for C18H28Si2 : 300.1728. Found 300.1736 (**M**+). ***(Z)*-1,4-Bis(trimethylsilyl)-2-(3-ethylphenyl)-1-buten-3-yne:** 1H-NMR (400 MHz, CDCl3)  0.256 (9H, s), 0.263 (9H, s), 1.25 (3H, t, J = 7.6Hz), 2.67 (2H, q, J = 7.6Hz), 6.60 (1H, s), 7.12 (1H, d, J = 7.6Hz), 7.25 (1H, t, J = 7.6Hz), 7.49 (1H, d, J = 9.2Hz), 7.51 (1H, s). 13C-NMR (100 MHz, CDCl3)  -0.93, -0.09, 15.69, 29.02, 99.19, 104.91, 123.23, 125.31, 127.65, 128.04, 137.13, 137.96, 138.90, 143.94.**4-Trimethylsilyl-2-(2-ethylphenyl)-1-buten-3-yne:** 1H-NMR (400MHz, CDCl3)  0.19 (9H, s), 1.25 (3H, t, J = 7.6Hz), 2.83 (2H, q, J = 7.6Hz), 5.49 (1H, d, J = 2.0Hz), 5.81 (1H, d, J = 2.0Hz), 7.14-7.29 (4H, m). 13C-NMR (100MHz, CDCl3)  0.03, 15.61, 26.18, 95.43, 104.88, 125.64, 126.29, 127.96, 128.57, 128.91, 131.77, 138.52, 141.64. IR (neat) 2964, 2933, 2898, 2873, 2145, 1647, 1599, 1510, 1487, 1454, 1410, 1305, 1250, 1129, 1093, 1062, 1032, 844, 759, 700 cm-1. MS (EI, 70eV) *m/z* (%) 228 (33, **M**+), 213 (100), 197 (50), 169 (51), 156 (22), 99 (27), 83 (67), 73 (83), 59 (49). HRMS (EI,70eV) Calcd for C15H20Si: 228.1333. Found: 228.1333 (**M**+).

**Reaction of Isopropylbenzene (Method A)**. *(Z)*-1,4-Bis(trimethylsilyl)-2-(2-isopropylphenyl)-1-buten-3-yne,  *(Z)*-1,4-bis(trimethylsilyl)-2-(3-isopropylphenyl)-1-buten-3-yne, *(Z)*-1,4-bis(trimethylsilyl)-2-(4-isopropylphenyl)-1-buten-3-yne, and 4-trimethylsilyl-2-(2-isopropylphenyl)-1-buten-3-ynewere obtained in 23%, 6%, 6%, and 20% yield, respectively, which were determined by 1H-NMR. Authentic samples were obtained by GPC (CHCl3) isolation. ***(Z)*-1,4-Bis(trimethylsilyl)-2-(2-isopropylphenyl)-1-buten-3-yne:** 1H-NMR (400 MHz, Acetone-d6 )  0.17 (9H,s), 0.26 (9H, s), 1.21 (6H, d, J = 6.8Hz), 3.45 (1H, m), 6.09 (1H, s), 7.08 (1H, dd, J = 7.6, 1.6Hz), 7.12 (1H, dt, J = 7.5, 1.6Hz), 7.26 (1H, dt, J = 7.3, 1.6Hz), 7.31 (1H, d, J = 8.0Hz). 13C-NMR (100MHz, CDCl3)  -0.96, -0.16, 24.12, 29.60, 99.19, 105.82, 125.29, 125.46, 127.70, 128.48, 138.83, 141.51, 143.82, 145.65. IR (neat) 2961, 2898, 2143, 1552, 1481, 1445, 1308, 1249, 1088, 1011, 841, 758, 728 cm-1. MS (EI, 70eV) *m/z* (%) 314 (1, **M**+), 299 (4), 241 (72), 211 (28), 183 (4), 155 (10), 97 (7), 73 (100). HRMS (EI,70eV) Calcd. for C19H30Si2: 314.1884. Found: 314.1882 (**M**+). ***(Z)*-1,4-Bis(trimethylsilyl)-2-(4-isopropylphenyl)-1-buten-3-yne:** 1H-NMR (400 MHz, CDCl3)  0.247 (9H, s), 0.250 (9H,s), 1.24 (6H, d, J = 7.2Hz), 2.90 (1H, m), 6.55 (1H,s), 7.19 (2H, d, J = 8.8Hz), 7.59 (2H, d, J = 8.8Hz). 13C-NMR (100MHz, CDCl3)  -0.92, -0.07, 24.05, 33.93, 98.99, 104.90, 125.74, 126.15, 136.52, 136.80, 137.19, 148.87. IR (neat) 2960, 2898, 2148, 1542, 1509, 1461, 1415, 1249, 1056, 1012, 863, 839, 759, 715 cm-1. MS (EI, 70eV) *m/z* (%) 314 (28, **M**+), 299 (20), 271 (16), 241 (8), 211 (8), 183 (54), 155 (69), 73 (100), 43 (14). HRMS (EI,70eV) Calcd. for C19H30Si2: 314.1884. Found: 314.1893 (**M**+). ***(Z)*-1,4-Bis(trimethylsilyl)-2-(3-isopropylphenyl)-1-buten-3-yne:** 1H-NMR (400 MHz, CDCl3)  0.255 (9H,s), 0.263 (9H,s), 1.26 (6H, d, J = 6.8Hz), 2.91 (1H, m), 6.59 (1H, s), 7.15 (1H, d, J = 8.0Hz), 7.26 (1H, t, J = 7.6Hz), 7.48 (1H, td, J = 7.6, 1.4Hz). 13C-NMR (100MHz, CDCl3)  -0.92, -0.09, 24.09, 34.28, 99.22, 104.95, 123.28, 124.00, 126.27, 128.01, 137.18, 137.81, 138.81, 145.58. IR (neat) 2960, 2898, 2146, 1602, 1545, 1463, 1249, 1185, 1097, 1027, 911, 842, 793, 760 cm-1. MS (EI, 70eV) *m/z* (%) 314 (42, **M**+), 299 (32), 271 (8), 211 (11), 183 (31), 155 (93), 97 (16), 73 (100). HRMS (EI,70eV) Calcd. for C19H30Si2: 314.1884. Found: 314.1877 (**M**+). **4-Trimethylsilyl-2-(2-isopropylphenyl)-1-buten-3-yne:** 1H-NMR (400 MHz, CDCl3)  0.17 (9H, s), 1.23 (6H, d, J = 6.8Hz), 3.48 (1H, septet, J = 6.8Hz), 5.47 (1H, d, J = 1.6Hz), 5.79 (1H, d, J = 2.0Hz), 7.12-7.18 (2H, m), 7.29-7.30 (2H, m). 13C-NMR (100 MHz, CDCl3)  0.01, 24.17, 29.68, 95.59, 105.04, 125.46, 125.53, 126.17, 128.15, 128.87, 131.96, 138.12, 146.46. IR (neat) 2963, 2928, 2869, 2145, 1750, 1645, 1600, 1486, 1463, 1251, 1034, 845, 760 cm-1. MS (EI, 70eV) *m/e* (%) 242 (16, **M**+), 227 (28), 211 (19), 199 (10), 183 (13), 169 (12), 155 (9), 147 (17), 97 (9), 83 (13), 73 (100), 59 (24), 43 (12). HRMS (EI,70eV) Calcd. for C16H22Si: 242.1489. Found: 242.1470 (**M**+).

**Reaction of *t*-Butylbenzene (Method A)**. *(Z)*-1,4-Bis(trimethylsilyl)-2-[3-(*t*-butyl)phenyl]-1-buten-3-yne, *(Z)*-1,4-bis(trimethylsilyl)-2-[4-(*t*-butyl)phenyl]-1-buten-3-yne, and 4-trimethylsilyl-2-[3-(*t*-butyl)phenyl]-1-buten-3-ynewere obtained in 17%, 3%, and 19% yield, respectively, which were determined by 1H-NMR. Authentic samples were obtained by GPC (CHCl3) isolation. ***(Z)*-1,4-Bis(trimethylsilyl)-2-(3-*t*-butylphenyl)-1-buten-3-yne:** 1H-NMR (400 MHz,Acetone-d6)  0.26 (1H, s), 0.27 (1H, s), 1.32 (9H, s), 6.74 (1H, s), 7.28 (1H, t, J = 7.8Hz), 7.38 (1H, d, J = 8.0Hz), 7.52 (1H, d, J = 7.2Hz), 7.82 (1H, s). 13C-NMR (100 MHz, CDCl3)  -0.90, -0.09, 31.43, 34.88, 99.28, 105.02, 122.67, 123.23, 125.11, 127.75, 137.35, 137.60, 138.45, 150.83. IR (neat) 2960, 2900, 2146, 1601, 1546, 1480, 1409, 1249, 1205, 1032, 886, 842, 792, 760 cm-1. MS (EI, 70eV) *m/z* (%) 328 (51, **M**+), 313 (35), 271 (13), 183 (55), 155 (88), 97 (16), 73 (100), 57 (42). HRMS (EI,70eV) Calcd for C20H32Si2: 328.2040. Found: 328.2036 (**M**+). ***(Z)*-1,4-Bis(trimethylsilyl)-2-[4-(*t*-butyl)phenyl]-1-buten-3-yne:** 1H-NMR (400 MHz, CDCl3)  0.247 (9H, s), 0.250 (9H, s), 1.32 (9H, s), 6.56 (1H, s), 7.36 (2H, d, J = 8.8Hz), 7.60 (2H, d, J = 8.8Hz). **4-Trimethylsilyl-2-[3-(*t*-butyl)phenyl]-1-buten-3-yne:** 1H-NMR (400 MHz, Acetone-d6)  0.24 (9H, s), 1.33 (9H, s), 5.66 (1H, d, J = 0.4 Hz), 6.06 (1H, d, J = 1.2 Hz), 7.30 (1H, t, J = 7.6 Hz), 7.40 (1H, ddd, J = 7.6, 2.0, 1.0 Hz), 7.50 (1H, ddd, J = 7.6, 2.0, 1.0Hz), 7.78 (1H, t, J = 1.8Hz). 13C-NMR (100 MHz, CDCl3)  0.14, 31.41, 34.87, 95.78, 104.38, 120.82, 122.79, 123.44, 125.26, 127.89, 130.92, 136.49, 150.99. IR (neat) 2962, 2869, 2149, 1593, 1483, 1408, 1251, 1090, 958, 893, 874, 843, 797, 760 cm-1. MS (EI, 70eV) *m/z* (%) 256 (31, **M**+), 241 (92), 199 (8), 183 (9), 155 (9), 97 (21), 83 (7), 73 (100), 57 (39). HRMS (EI,70eV) Calcd for C17H24Si: 256.1646. Found: 256.1639 (**M**+).

**Reaction of *m*-Xylene (Method B).** *(Z)*-1,4-Bis(trimethylsilyl)-2-(2,4-dimethylphenyl)-1-buten-3-yne, *(Z)*-1,4-bis(trimethylsilyl)-2-(2,6-dimethylphenyl)-1-buten-3-yne,4-trimethylsilyl-2-(2,4-dimethylphenyl)-1-buten-3-yne, and 4-trimethylsilyl-2-(2,6-dimethylphenyl)-1-buten-3-yne were obtained in 48%, 32%, 5% and 2% yield, respectively, which were determined by 1H-NMR. Authentic samples were obtained by GPC (CHCl3) isolation. ***(Z)*-1,4-Bis(trimethylsilyl)-2-(2,4-dimethylphenyl)-1-buten-3-yne:** 1H-NMR (400 MHz, Acetone-d6)  0.18 (9H, s), 0.26 (9H, s), 2.26 (3H, s), 2.33 (3H, s), 6.10 (1H,s), 6.96 (1H, d, J = 7.6 Hz), 6.97 (1H,s), 7.06 (1H, d, J = 7.6 Hz). 13C-NMR (100 MHz, CDCl3)  -0.91, -0.13, 20.30, 21.16, 98.84, 105.53, 126.33, 128.21, 130.87, 134.56, 136.99, 138.52, 139.30, 143.40. IR (neat) 2957, 2144, 1613, 1550, 1495, 1448, 1309, 1249, 1214, 1124, 1012, 840, 759 cm-1. MS (EI, 70eV) *m/z* (%) 300 (8, **M**+), 285 (11), 227 (100), 211 (23), 197 (26), 155 (57), 97 (15), 83 (8), 73 (93). HRMS (EI,70eV) Calcd for C18H28Si2: 300.1728. Found: 300.1725 (**M**+). ***(Z)*-1,4-Bis(trimethylsilyl)-2-(2,6-dimethylphenyl)-1-buten-3-yne:** 1H-NMR (400 MHz, CDCl3)  0.17 (9H, s), 0.27 (9H, s), 2.29 (6H, s), 5.92 (1H, s), 7.02 (2H, d, J = 7.2 Hz), 7.07 (1H, dd, J = 8.6, 5.8 Hz). 13C-NMR (100 MHz, CDCl3)  -0.91, -0.13, 20.17, 97.84, 105.03, 126.65, 127.23, 134.68, 137.16, 141.90, 143.59. IR (neat) 2957, 2141, 1558, 1466, 1301, 1249, 1200, 1007, 841, 758, 711 cm-1. MS (EI, 70eV) *m/z* (%) 300 (15, **M**+), 285 (14), 227 (100), 211 (25), 197 (34), 155 (56), 97 (15), 73 (94). HRMS (EI,70eV) Calcd for C18H28Si2: 300.1728. Found: 300.1720 (**M**+). **4-Trimethylsilyl-2-(2,4-dimethylphenyl)-1-buten-3-yne and 4-Trimethylsilyl-2-(2,6-dimethylphenyl)-1-buten-3-yne:** 1H-NMR (400 MHz, CDCl3, 2,4-isomer)  0.18 (9H, s), 2.32 (3H, s), 2.40 (3H, s), 5.48 (1H, d, J = 2.0 Hz), 5.78 (1H, d, J = 2.0 Hz), 6.99 (1H, d, J = 8.4 Hz), 7.00 (1H, s), 7.15 (1H, d, J = 7.4 Hz). 1H-NMR (400 MHz, CDCl3, 2,6-isomer)  0.16 (9H, s), 2.32 (6H, s), 5.32 (1H, d, J = 2.0 Hz), 5.89 (1H, d, J = 2.0 Hz), 7.04 (2H, d, J = 7.6 Hz), 7.10 (1H, dd, J = 8.6, 6.2 Hz). 13C-NMR (100 MHz, CDCl3, 2,4-isomer)  0.04, 20.32, 21.16, 95.29, 104.79, 125.79, 127.30, 131.04, 131.64, 133.76, 135.30, 136.00, 137.47. IR (neat) 2958, 2923, 2145, 1613, 1595, 1498, 1445, 1305, 1250, 1137, 1081, 1035, 958, 907, 843, 760 cm-1. MS (EI, 70eV) *m/z* (%) 228 (70, **M**+), 213 (100), 197 (32), 155 (15), 83 (65), 73 (68). HRMS (EI,70eV) Calcd for C15H20Si: 228.1333. Found: 228.1330 (**M**+).

**Reaction of *o*-Xylene (Method A)**.  *(Z)*-1,4-Bis(trimethylsilyl)-2-(2,3-dimethylphenyl)-1-buten-3-yne, *(Z)*-1,4-bis(trimethylsilyl)-2-(3,4-dimethylphenyl)-1-buten-3-yne, and 4-trimethylsilyl-2-(2,3-dimethylphenyl)-1-buten-3-ynewere obtained in 36%, 9%, and 5% yield, respectively, which were determined by 1H-NMR. Authentic samples were obtained by GPC (CHCl3) isolation. ***(Z)*-1,4-Bis(trimethylsilyl)-2-(2,3-dimethylphenyl)-1-buten-3-yne and *(Z)*-1,4-Bis(trimethylsilyl)-2-(3,4-dimethylphenyl)-1-buten-3-yne**: 1H-NMR (400 MHz, CD2Cl2, 2,3-isomer)  0.19 (9H,s), 0.26 (9H,s), 2.27 (3H,s), 2.28 (3H,s), 6.06 (1H,s), 7.00 (1H,dd,J = 7.6, 2.0Hz), 7.04 (1H, t, J = 7.4Hz), 7.08 (1H, dd, J = 6.8, 1.4 Hz). 1H-NMR (400 MHz, CD2Cl2, 3,4-isomer)  0.19 (9H, s), 0.26 (9H, s), 2.26 (3H, s), 2.27 (3H, s), 6.58 (1H, s), 7.10 (1H ,d ,J = 7.6Hz), 7.39 (1H, d, J = 8.0Hz), 7.43 (1H, s).13C-NMR (100MHz, CDCl3, 2,3-isomer)  -0.94, -0.10, 16.79, 20.61, 99.00, 105.59, 125.25, 126.09, 128.91, 133.24, 136.77, 139.22, 142.58, 143.59. IR (neat) 2957, 2898, 2142, 1648, 1550, 1501, 1469, 1407, 1308, 1249, 1165, 1127, 1098, 1078, 1038, 1005, 842, 775, 760, 716 cm-1. MS (EI, 70eV) *m/z* (%) 300 (18, **M**+), 285 (20), 227 (97), 211 (28), 197 (34), 155 (72), 97 (16), 73 (100). HRMS (EI,70eV) Calcd for C18H28Si2: 300.1728. Found: 300.1723 (**M**+). **4-Trimethylsilyl-2-(2,3-dimethylphenyl)-1-buten-3-yne and 4-Trimethylsilyl-2-(3,4-dimethylphenyl)-1-buten-3-yne:** 1H-NMR (400 MHz, CDCl3, 2,3-isomer)  0.18 (9H,s), 2.30 (3H, s), 2.32 (3H, s), 5.47 (1H, d, J = 2.0Hz), 5.80 (1H, d, J = 2.0Hz), 7.07-7.13 (3H, m). 1H-NMR (400 MHz, CDCl3, 3,4-isomer)  0.25 (9H,s), 2.26 (3H, s), 2.28 (3H, s), 5.64 (1H, d, J = 0.8Hz), 5.87 (1H, d, J = 0.8Hz), 7.11 (1H,d, J = 6.0Hz), 7.37 (1H, d, J = 7.6Hz), 7.40 (1H, s). 13C-NMR (100 MHz, CDCl3, 2,3-isomer)  0.07, 16.78, 20.60, 95.44, 104.86, 125.31, 126.04, 126.52, 129.33, 132.34, 134.03, 136.95, 139.30. IR (neat) 2959, 2145, 1732, 1646, 1579, 1456, 1250, 1121, 1085, 959, 907, 863, 844, 788, 760, 730 cm-1. MS (EI, 70eV) *m/z* (%) 228 (40, **M**+), 213 (72), 197 (42), 185 (17), 169 (22), 156 (20), 83 (100), 73 (48). HRMS (EI,70eV) Calcd for C15H20Si: 228.1333. Found: 228.1335 (**M**+).

**Reaction of 1,2,3,4-Tetrahydronaphthalene (Method A).***(Z)*-1,4-Bis(trimethylsilyl)-2-(1,2,3,4-tetrahydro-5-naphthyl)-1-buten-3-yne and 4-trimethylsilyl-2-(1,2,3,4-tetrahydro-5-naphthyl)-1-buten-3-yne were obtained in 38% and 26% yield, respectively, were isolated by flash chromatography over silica gel (hexane). ***(Z)*-1,4-Bis(trimethylsilyl)-2-(1,2,3,4-tetrahydro-5-naphthyl)-1-buten-3-yne:** 1H-NMR (400 MHz, CD2Cl2)  0.19 (9H, s), 0.25 (9H, s), 1.76 (4H, m), 2.79 (4H, br), 6.05 (1H, s), 6.95 (1H, dd, J = 7.2, 1.6Hz), 7.00 (1H, dd, J = 7.6, 1.6Hz), 7.04 (1H, t, J = 7.4Hz). 13C-NMR (100 MHz, CDCl3)  -0.92, -0.11, 23.07, 23.84, 27.36, 30.04, 99.03, 105.33, 125.17, 125.61, 128.45, 134.05, 137.07, 138.79, 142.30, 143.65. IR (neat) 2955, 2859, 2142, 1550, 1450,1309, 1249, 1046, 994, 841, 772, 759, 714 cm-1. MS (EI, 70eV) *m/z* (%) 326 (20, **M**+), 311 (15), 253 (51), 238 (31), 223 (24), 155 (35), 97 (11), 73 (100), 57 (56), 43 (37). HRMS (EI,70eV) Calcd for C20H30Si2: 326.1884. Found: 326.1884 (**M**+). **4-Trimethylsilyl-2-(1,2,3,4-tetrahydro-5-naphthyl)-1-buten-3-yne:** 1H-NMR (400 MHz, CD2Cl2)  0.19 (9H, s), 1.79 (4H, m), 2.82 (4H, br), 5.45 (1H, d, J = 1.6Hz), 5.76 (1H, d, J = 2.0Hz), 7.00 (1H, dd, J = 6.8, 2.4Hz), 7.04 (1H, dd, J = 6.6, 2.8Hz), 7.08 (1H, t, J = 7.4Hz). 13C-NMR (100 MHz, CDCl3)  0.07, 23.02, 23.30, 27.41, 30.02, 95.47, 104.63, 125.20, 126.07, 126.10, 128.90, 131.91, 134.80, 137.27, 139.00. IR (neat) 2931, 2858, 2145, 1731, 1579, 1499, 1451, 1436, 1306, 1249, 1140, 1084, 971, 950, 906, 841, 781, 760, 729 cm-1. MS (EI, 70eV) *m/z* (%) 254 (54, **M**+), 239 (100), 223 (34), 211 (19), 195 (22), 179 (19), 165 (21), 83 (22), 73 (95), 59 (32). HRMS (EI,70eV) Calcd for C17H22Si: 254.1489. Found: 254.1476 (**M**+).

**Reaction of 1,3,5-Trimethylbenzene (Method A)**. ***(Z)*-1,4-Bis(trimethylsilyl)-2-(2,4,6-trimethylphenyl)-1-buten-3-yne:** 1H-NMR (400 MHz, CDCl3)  0.16 (9, s), 0.25 (9, s), 2.25 (6, s), 2.27 (3, s), 5.89 (1H, s), 6.85 (2H, s). 13C-NMR (100 MHz, CDCl3)  -0.10, -0.06, 20.09, 21.12, 97.62, 105.26, 128.02, 134.57, 136.16, 137.20, 139.18, 143.66. IR (neat) 2957, 2138, 1611, 1561, 1478, 1302, 1249, 1211, 1152, 1008, 841, 759, 742 cm-1. MS (EI, 70eV) *m/z* (%) 314 (14, **M**+), 299 (11), 241 (100), 225 (16), 211 (20), 155 (31), 97 (9), 73 (53). HRMS (EI,70eV) Calcd for C19H30Si2: 314.1884. Found: 314.1894 (**M**+).

**Reaction of 1,2,3-Trimethylbenzene (Method A)**. *(Z)*-1,4-Bis(trimethylsilyl)-2-(2,3,4-trimethylphenyl)-1-buten-3-yne and 4-trimethylsilyl-2-(2,3,4-trimethylphenyl)-1-buten-3-ynewere obtained in 66%, 14% yield, respectively, which were isolated by flash chromatography over silica gel (hexane). ***(Z)*-1,4-Bis(trimethylsilyl)-2-(2,3,4-trimethylphenyl)-1-buten-3-yne:** 1H-NMR (400 MHz, Acetone-d6)  0.17 (9H, s), 0.26 (9H, s), 2.16 (3H, s), 2.24 (3H, s), 2.28 (3H, s), 6.04 (1H, s), 6.88 (1H, d, J = 8Hz), 6.95 (1H, d, J = 8Hz). 13C-NMR (100 MHz, CDCl3)  -0.93, -0.09, 15.94, 17.46, 20.94, 98.77, 105.80, 125.41, 127.03, 133.06, 135.23, 135.58, 139.52, 140.70, 143.23. IR (neat) 2957, 2898, 2140, 1552, 1477, 1454, 1408, 1308, 1249, 1090, 1071, 1003, 922, 840, 783, 759, 735 cm-1. MS (EI, 70eV) *m/z* (%) 314 (9, **M**+), 299 (10), 241 (100), 225 (21), 211 (23), 155 (30), 97 (12), 73 (77). HRMS (EI,70eV) Calcd. for C19H30Si2: 314.1884. Found 314.1873 (**M**+). **4-Trimethylsilyl-2-(2,3,4-trimethylphenyl)-1-buten-3-yne:** 1H-NMR (400 MHz, Acetone-d6)  0.15 (9H, s), 2.17 (3H, s), 2.25 (3H, s), 2.30 (3H, s), 5.43 (1H, d, J = 2.0Hz), 5.72 (1H, d, J = 1.6Hz), 6.91 (1H, d, J = 8.0Hz), 6.97 (1H, d, J = 8.0Hz). 13C-NMR (100 MHz, CDCl3)  0.08, 15.94, 17.45, 20.95, 95.21, 105.10, 125.76, 125.86, 127.10, 132.61, 133.84, 135.42, 136.08, 137.35. IR (neat) 2959, 2149, 1645, 1597, 1483, 1455, 1409, 1301, 1250, 1162, 1139, 1033, 961, 916, 844, 760 cm-1. MS (EI, 70eV) *m/z* (%) 242 (88, **M**+), 227 (99), 211 (37), 197 (21), 183 (38), 170 (41), 83 (100), 73 (86). HRMS (EI,70eV) Calcd for C16H22Si: 242.1489. Found: 242.1498.

**Reaction of Naphthalene (Method B).** *(Z)*-1,4-Bis(trimethylsilyl)-2-(1-naphthyl)-1-buten-3-yne, *(Z)*-1,4-bis(trimethylsilyl)-2-(2-naphthyl)-1-buten-3-yne, and 4-trimethylsilyl-2-(1-naphthyl)-1-buten-3-ynewere obtained in 45%, 13%, and 15% yield, respectively, which were determined by 1H-NMR. Authentic samples were obtained by GPC (CHCl3) isolation. ***(Z)*-1,4-Bis(trimethylsilyl)-2-(1-naphthyl)-1-buten-3-yne:** 1H-NMR (400 MHz, CDCl3)  0.19 (9H, s), 0.33 (9H, s), 6.34 (1H, s), 7.41-7.52 (4H, m), 7.78 (1H, dd, J = 6.4, 3.2Hz), 7.80 (1H, dd, J = 6.2, 3.0Hz), 8.29 (1H, dd, J = 6.4, 2.8Hz). 13C-NMR (100 MHz, CDCl3)  -0.89, -0.16, 99.26, 106.02, 125.20, 125.37, 125.58, 125.70, 126.03, 127.86, 128.05, 130.24, 133.52, 137.20, 140.37, 145.31. IR (neat) 3059, 2957, 2898, 2140, 1546, 1507, 1302, 1249, 1097, 1054, 1019, 841, 801, 793, 778, 759, 715 cm-1. MS (EI, 70eV) *m/z* (%) 322 (57, **M**+), 307 (14), 248 (20), 234 (87), 219 (18), 155 (47), 97 (16), 73 (100). HRMS (EI,70eV) Calcd for C20H26Si2: 322.1571. Found: 322.1575 (**M**+). ***(Z)*-1,4-Bis(trimethylsilyl)-2-(2-naphthyl)-1-buten-3-yne:** 1H-NMR (400 MHz, CDCl3)  0.296 (9H, s), 0.299 (9H, s), 6.76 (1H, s), 7.42-7.50 (2H, m), 7.76-7.87 (4H, m), 8.15 (1H, s). 13C-NMR (100 MHz, CDCl3)  -0.90, -0.05, 99.54, 104.73, 123.33, 125.56, 125.59, 126.05, 127.39, 127.61, 128.42, 133.04, 133.11, 136.10, 136.81, 138.69. IR (neat) 3059, 2957, 2898, 2140, 1546, 1507, 1302, 1249, 1097, 1054, 1019, 841, 801, 793, 778, 759, 715 cm-1. MS (EI, 70eV) *m/z* (%) 322 (57, **M**+), 307 (14), 248 (20), 234 (87), 219 (18), 155 (47), 97 (16), 73 (100). HRMS (EI,70eV) Calcd for C20H26Si2: 322.1571. Found: 322.1575 (**M**+). **4-Timethylsilyl-2-(1-naphthyl)-1-buten-3-yne:** 1H-NMR (400 MHz, CDCl3) d 0.17 (9H, s), 5.71 (1H, d, J = 2.0Hz), 5.99 (1H, d, J = 2.0Hz), 7.42 -7.53 (4H, m), 7.80-7.86 (2H, m), 8.33-8.35 (1H, m). 13C-NMR (100 MHz, CDCl3)  0.03, 95.85, 105.27, 125.20, 125.66, 125.73, 125.92, 127.14, 128.09, 128.32, 130.57, 130.64, 133.52, 137.06, 145.31. IR (neat) 3046, 2958, 2140, 1593, 1507, 1401, 1298, 1250, 1197, 841, 802, 777, 760, 702 cm-1. MS (EI, 70eV) *m/z* (%) 250 (100, **M**+), 235 (70), 219 (20), 191 (39), 117 (23), 83 (32), 73 (50). HRMS (EI,70eV) Calcd for C17H18Si: 250.1176. Found: 250.1175 (**M**+).

**Reaction of 1-Methylnaphthalene (Method B)**. *(Z)*-1,4-Bis(trimethylsilyl)-2-(1-methyl-2-naphthyl)-1-buten-3-yne, *(Z)*-1,4-bis(trimethylsilyl)-2-(1-methyl-4-naphthyl)-1-buten-3-yne, 4-trimethylsilyl-2-(1-methyl-2-naphthyl)-1-buten-3-yne, and4-trimethylsilyl-2-(1-methyl-4-naphthyl)-1-buten-3-yne were obtained in 40%, 25%, 10%, and 4% yield, respectively, which were determined by 1H-NMR. Authentic samples were obtained by GPC (CHCl3) isolation. ***(Z)*-1,4-Bis(trimethylsilyl)-2-(1-methyl-2-naphthyl)-1-buten-3-yne and *(Z)*-1,4-Bis(trimethylsilyl)-2-(1-methyl-4-naphthyl)-1-buten-3-yne:** 1H-NMR (400 MHz, CD2Cl2, 2-isomer)  0.20 (9H, s), 0.31 (9 H,s), 2.71 (3H, s), 6.18 (1H, s), 7.36 (1H, d, J = 8.4 Hz), 7.48 (1H, t, J = 6.8 Hz), 7.54 (1H, t, J = 6.8 Hz), 7.82 (1H, d, J = 9.2 Hz), 8.08 (1H, d, J = 8.8 Hz). 1H-NMR (400 MHz, CDCl3, 4-isomer)  0.17 (9H, s), 0.32 (9H,s), 2.69 (3H, s), 6.29 (1H, s), 7.27 (1H, d, J = 7.2 Hz), 7.33 (1H, d, J = 7.2 Hz), 7.44-7.54 (2H, m), 8.00 (1H, dd, J = 6.0, 2.0 Hz), 8.29 (1H, dd, J = 6.0, 2.0 Hz). 13C-NMR (100 MHz, CDCl3, 2-isomer)  -0.86, -0.08, 16.20, 99.34, 105.75, 124.39, 125.28, 125.88, 125.90, 126.74, 128.22, 130.15, 132.67, 132.75, 139.15, 139.21, 144.53. 13C-NMR (100 MHz, CDCl3, 4-isomer)  -0.83, -0.11, 19.69, 99.11, 106.28, 124.15, 125.05, 125.23, 125.47, 126.02, 126.34, 130.32, 132.54, 137.55, 138.05, 138.93, 144.91. IR (neat) 3054, 2957, 2898, 2141, 1550, 1298, 1249, 1084, 997, 841, 784, 759, 718 cm-1. MS (EI, 70eV) *m/z* (%) 336 (38, **M**+), 321 (13), 263 (77), 248 (40), 233 (28), 155 (41), 97 (16), 73 (100). HRMS (EI,70eV) Calcd for C21H28Si2: 336.1728. Found: 336.1735 (**M**+). **4-Trimethylsilyl-2-(1-methyl-2-naphthyl)-1-buten-3-yne and 4-Trimethylsilyl-2-(1-methyl-4-naphthyl)-1-buten-3-yne:** 1H-NMR (400 MHz, CDCl3)  0.17 (9H, s), 2.70 (3H, s), 5.68 (1H, d, J = 2.0 Hz), 5.97 (1H, d, J = 2.0 Hz), 7.29 (1H, d, J = 7.2 Hz), 7.34 (1H, d, J = 7.2 Hz), 7.51-7.54 (2H, m), 8.01 (1H, dd, J = 7.6, 2.6 Hz), 8.36 (1H, dd, J = 7.6, 2.6 Hz). 1H-NMR (400 MHz, CDCl3, 4-isomer)  0.19 (9H, s), 2.76 (3H, s), 5.54 (1H, d, J = 2.0 Hz), 5.94 (1H, d, J = 2.0 Hz), 7.39 (1H, d, J = 8.4 Hz), 7.48-7.56 (2H, m), 7.69 (1H, d, J = 8.0 Hz), 7.82 (1H, d, J = 7.2 Hz), 8.08 (1H, d, J = 8.8 Hz). 13C-NMR (100 MHz, CDCl3, 2-isomer)  0.03, 19.72, 99.65, 105.47, 124.20, 125.36, 125.60, 125.63, 126.00, 126.29, 126.90, 128.24, 130.60, 130.83, 132.55, 134.62. IR (neat) 2958, 2145, 1594, 1513, 1442, 1250, 908, 843, 784, 759 cm-1. MS (EI, 70eV) *m/z* (%) 264 (100, **M**+), 249 (92), 233 (22), 205 (33), 125 (21), 117 (41), 97 (43), 83 (33), 73 (47). HRMS (EI,70eV) Calcd for C18H20Si: 264.1333. Found: 264.1330 (**M**+).

**Reaction of 1,4-Dimethylnaphthalene (Method B)**. *(Z)*-1,4-Bis(trimethylsilyl)-2-(1,4-dimethyl-2-naphthyl)-1-buten-3-yne and 4-trimethylsilyl-2-(1,4-dimethyl-2-naphthyl)-1-buten-3-yne were obtained in 33% and 22% yield, respectively, which were isolated by flash chromatography over silica gel (hexane). ***(Z)*-1,4-Bis(trimethylsilyl)-2-(1,4-dimethyl-2-naphthyl)-1-buten-3-yne:** 1H-NMR (400 MHz, CDCl3)  0.19 (9H, s), 0.30 (9H, s), 2.67 (3H, s), 2.69 (3H, s), 6.14 (1H, s), 7.22 (1H, s), 7.49-7.56 (2H, m), 7.98 (1H, dd, J = 7.2, 1.6Hz), 8.08 (1H, dd, J = 7.2, 1.6Hz). 13C-NMR (100 MHz, CDCl3)  -0.89, -0.10, 16.06, 19.36, 99.31, 105.78, 124.33, 124.93, 125.11, 125.54, 127.42, 128.19, 131.81, 131.92, 132.90, 138.86, 139.27, 144.27. IR (neat) 2957, 2898, 2141, 1601, 1550, 1444, 1410, 1294, 1249, 1109, 1061, 1012, 971, 841, 754 cm-1. MS (EI, 70eV) *m/z* (%) 350 (20, **M**+), 335 (8), 277 (100), 155 (33), 97 (12), 73 (73). HRMS (EI,70eV) Calcd for C22H30Si2: 350.1884. Found: 350.1874 (**M**+). **4-Trimethylsilyl-2-(1,4-dimethyl-2-naphthyl)-1-buten-3-yne:** 1H-NMR (400 MHz, CDCl3)  0.19 (9H, s), 2.67 (3H, s), 2.72 (3H, s), 5.53 (1H, d, J = 2.0Hz), 5.92 (1H, d, J = 1.6Hz), 7.24 (1H, s), 7.50-7.57 (2H, m), 7.99 (1H, dd, J = 8.0, 1.6Hz), 8.10 (1H, dd, J = 8.0, 1.6Hz). 13C-NMR (100 MHz, CDCl3)  0.08, 16.05, 19.37, 95.63, 105.12, 124.36, 124.92, 125.31, 125.64, 126.51, 127.59, 129.14, 131.94, 132.08, 132.35, 132.86, 135.65. IR (neat) 2959, 2147, 1602, 1510, 1445, 1409, 1280, 1250, 1164, 1028, 953, 909, 865, 843, 755, 700 cm-1. MS (EI, 70eV) *m/z* (%) 278 (100, **M**+), 263 (81), 247 (30), 233 (17), 219 (31), 206 (28), 132 (26), 124 (22), 97 (10), 83 (46), 73 (51). HRMS (EI,70eV) Calcd for C19H22Si: 278.1489. Found: 278.1487 (**M**+).

**Reaction of Toluene with 1,8-Bis(triethylsilyl)-1,3,5,7-octatetrayne (8)**. ***(Z)*-1,8-Bis(triethylsilyl)-2-(4-methylphenyl)-1-octen-3,5,7-triyne (9):** Under an argon atmosphere, to a solution of toluene (1.06 mL, 10 mmol) in CH2Cl2 (4 mL) was added a solution of GaCl3 (1.0 M in methylcyclohexane, 2.0 mL) at –90 °C. To this mixture, **8** (163 mg, 0.5 mmol) in CH2Cl2 (1 mL) was added. After the mixture was stirred for 2.5 h, THF (6 mL) was added, and stirring was continued for another 30 min. Then water was added, and the mixture was warmed to room temperature. The organic materials were extracted with hexane, and the organic layer was dried over MgSO4. Solvents were removed *in vacuo*, and the residue was purified by flash chromatography (silica gel, hexane) to give **9** (63 mg, 30%). 1H-NMR (400 MHz, CDCl3)  0.66 (6H, q, J = 8.0Hz), 0.78 (6H, q, J = 8.0Hz), 0.98-1.04 (18H, m), 2.35 (3H, s), 6.75 (1H, s), 7.15 (2H, d, J = 7.6Hz), 7.50 (2H, d, J = 8.0Hz). 13C-NMR (100 MHz, C6D6)  4.54, 4.64, 7.78, 8.10, 21.30, 61.77, 69.05, 78.04, 78.59, 88.44, 90.08, 126.28, 129.39, 136.14, 136.75, 138.65, 140.42. IR (neat) 2955, 2875, 2163, 2070, 1731, 1537, 1507, 1457, 1414, 1238, 1184, 1011, 974, 834, 809, 784, 763, 727 cm-1. MS (EI, 70eV) *m/z* (%) 418 (33, **M**+), 389 (91), 361 (21), 333 (11), 273 (100), 245 (57), 217 (60), 189 (18), 152 (32), 115 (18), 87 (24), 57 (17). HRMS (EI,70eV) Calcd for C27H38Si2: 418.2510. Found: 418.2505 (**M**+).

**Desilylation Reaction**. **4-Trimethylsilyl-2-(2,5-dimethylphenyl)-1-buten-3-yne.** To a solution of **7** (148 mg,0.49 mmol) in ether (4.9 mL) was added H2O (0.49 mL) and trifluoroacetic acid (5.2 mL, 69 mmol) at -78 °C. The mixture was warmed to room temperature, and stirred for 4 h. Saturated aqueous NaHCO3 was added, and the organic materials were extracted with ether. The organic layer was washed with saturated aqueous NaHCO3, dried over MgSO4, and concentrated. The residue was purified by flash chromatography (silica gel, hexane) to give 4-trimethylsilyl-2-(2,5-dimethylphenyl)-1-buten-3-yne (79 mg, 70%).

**Deuteration Experiment**. Under an argon atmosphere, to a solution of *p*-xylene (0.31 mL, 2.5 mmol) in CH2Cl2 (4 mL) was added a solution of GaCl3 (1.0 M in methylcyclohexane, 1.0 mL) at -90 °C. To this mixture, **1** (97 mg, 0.5 mmol) in CH2Cl2 (1 mL) was added. After the mixture was stirred for 30 min at -90 °C, THF (3 mL) was added dropwise, and stirring was continued for another 30 min. Then D2O was added, the mixture was warmed to room temperature. The organic materials were extrated with hexane, and the organic layer was dried over MgSO4. Solvents were removed *in vacuo*, and the residue was purified by flash chromatography (silica gel, hexane) to give **7** (69 mg, 46% yield, 0% deuterated) and 4-trimethylsilyl-2-(2,5-dimethylsilyl)-1-buten-3-yne (25 mg, 22% yield, 0% deuterated).

**Complexation Experiment Using React-IR**. Under an argon atmosphere, a solution of **7** (171 mg, 0.57 mmol) in CH2Cl2 (5 mL) was stirred for 5 min at -95 °C. To this solution, a solution of GaCl3 (1.0 M in methylcyclohexane, 0.57 mL) was added. After the mixture was stirred for 15 min at -95 °C, THF (3 mL) was added, and stirring was continued for 5 min. This reaction was monitored by React-IR.

**Inhibition Experiment**. Under an argon atmosphere, to a solution of *m*-xylene (33 L, 0.27 mmol), **1** (52 mg, 0.27 mmol), **7** (82 mg, 0.27 mmol) in CH2Cl2 (3 mL) was added a solution of GaCl3 (1.0 M in methylcyclohexane, 0.14 mL) at -90 °C. After the mixture was stirred for 1 h at -90 °C, THF (3 mL) was added, and stirring was continued for another 30 min. Then water was added, and the organic materials were extrated with hexane. The organic layer was dried over MgSO4, and concentrated. The residue was purified by flash chromatography (silica gel, hexane) to recover **7** (69 mg, 84%). When this reaction was conducted in the absence of **7**, *(Z)*-1,4-bis(trimethylsilyl)-2-(2,4-dimethylphenyl)-1-buten-3-yne and *(Z)*-1,4-bis(trimethylsilyl)-2-(2,6-dimethylphenyl)-1-buten-3-yne were obtained in 11% and 6% yield, respectively.
